# Supplementary material for: Structural analysis of metastable pharmaceutical loratadine form II, by 3D electron diffraction and DFT+D energy minimisation
Source: Royal Society of Chemistry journal article supplement (doi:10.1039/d0ce01216e), 2020-01-01
Supplement: d0ce01216e1.pdf [file d0ce01216e1.pdf]

## SUPPLEMENTARY INFORMATION

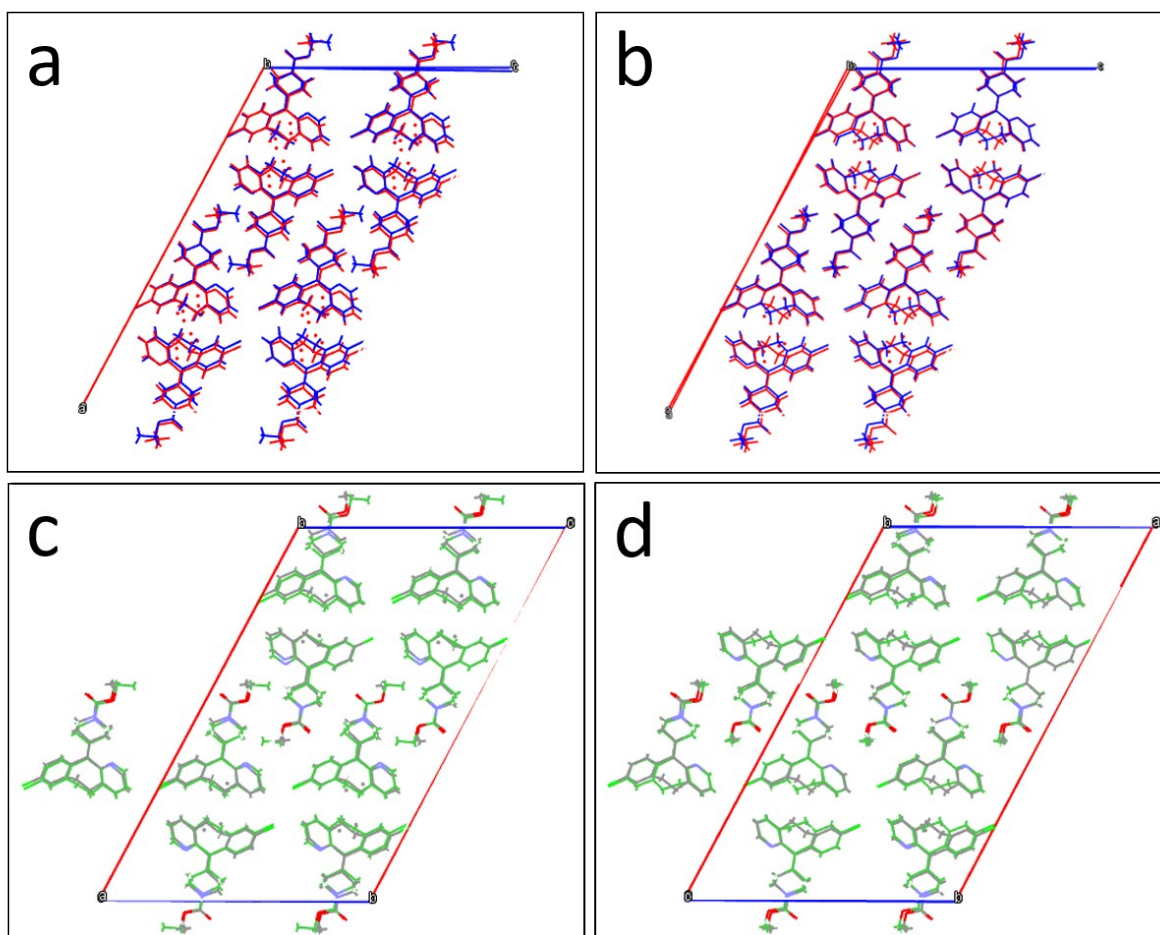

FIGURE S1: ON TOP THE MOLECULAR/STRUCTURAL OVERLAY OF FORM II SA ED STRUCTURE (BLUE) AND SINGLE-CRYSTAL X-RAY STRUCTURE (RED) AND ITS CRYSTAL PACKING SIMILARITY ON THE BOTTOM. TYPE 1 CONFORMATION SHOWN IN (A, C). TYPE 2 CONFORMATION SHOWN IN (B, D).

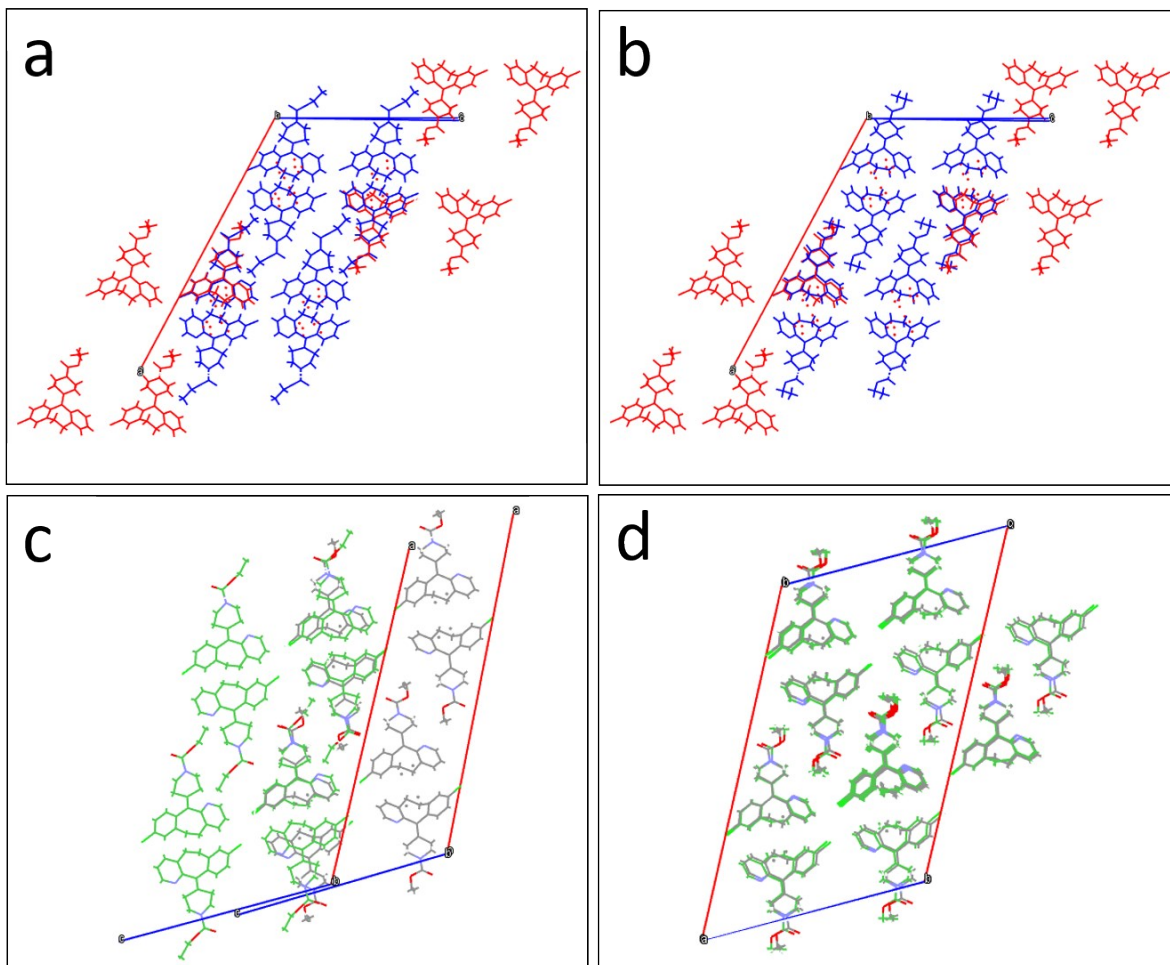

Figure S2: On top molecular/structural overlay of Form II SA ED refined structure (blue) and single-crystal X-ray structure (red) and its crystal packing similarity on the bottom. Type 1 conformation shown in (a, c). Type 2 conformation shown in (b, d).
